# Supplementary material for: Infant dietary patterns and early childhood weight outcomes: a secondary analysis from the Starting Early Program Trial
Source: Research Square preprint supplement (doi:10.21203/rs.3.rs-8077856/v1), 2025-11-25
Supplement: Supplementary file 1 [file 52c6002661b5083f567cd44c.docx]

| Variable | **Overall** | **Breastfed-**  **High variety**  136 (36.1) | **Formula fed-High variety**  96 (25.5) | **Formula fed-**  **Low variety**  91 (24.1) | **Mixed fed-Low variety**  54 (14.3) |  | *p*b |
| --- | --- | --- | --- | --- | --- | --- | --- |
| *Maternal characteristics* |  |  |  |  |  |  |  |
| Maternal age, yearsc | 29 ± 6 | 29 ± 6 | 29 ± 6 | 27 ± 6 | 30 ± 6 |  | 0.07 |
| Pre-pregnancy BMI (kg/m2)d | 27.7 ± 5.6 | 27.4 ± 5.1 | 27.6 ± 5.6 | 27.0 ± 5.6 | 29.3 ± 6.3 |  | 0.11 |
| Gestational weight gain (kg)e | 9.9 ± 5.2 | 9.7 ± 4.9 | 10.3 ± 5.0 | 9.8 ± 5.1 | 9.7 ± 6.3 |  | 0.86 |
| Legally/living as marriedf,g | 296 (79.1) | 122 (90.4) | 68 (71.6) | 65 (72.2) | 41 (75.9) |  | <0.01 |
| Employede,g | 99 (26.3) | 14 (10.3) | 32 (33.7) | 37 (40.7) | 16 (29.6) |  | <0.01 |
| High school education or greaterc | 249 (66.1) | 78 (57.4) | 73 (76.0) | 68 (74.7) | 30 (55.6) |  | <0.01 |
| Nulliparous | 122 (32.4) | 37 (27.2) | 38 (39.6) | 32 (35.2) | 15 (27.8) |  | 0.19 |
| Born outside the USe | 305 (81.1) | 121 (89.0) | 76 (79.2) | 63 (70.0) | 45 (83.3) |  | <0.01 |
| WIC participant at 10 monthsd | 351 (93.6) | 129 (94.9) | 89 (93.7) | 84 (93.3) | 49 (90.7) |  | 0.78 |
| Household food insecurityd,g,h | 76 (20.3) | 31 (22.8) | 22 (23.2) | 9 (10.0) | 14 (25.9) |  | 0.05 |
| StEP intervention group | 184 (48.8) | 80 (58.8) | 36 (37.5) | 44 (48.4) | 24 (44.4) |  | 0.01 |
|  |  |  |  |  |  |  |  |
| *Infant characteristics* |  |  |  |  |  |  |  |
| Infant age | 10.3 ± 0.6 | 10.3 ± 0.5 | 10.4 ± 0.6 | 10.4 ± 0.6 | 10.5 ± 0.6 |  | 0.10 |
| Male | 183 (48.5) | 61 (44.9) | 48 (50.0) | 54 (59.3) | 20 (37.0) |  | 0.05 |
| Cesarean delivery | 81 (21.5) | 21 (15.4) | 26 (27.1) | 23 (25.3) | 11 (20.4) |  | 0.14 |
| Birthweight (kg) | 3.4 ± 0.5 | 3.4 ± 0.4 | 3.4 ± 0.5 | 3.3 ± 0.5 | 3.4 ± 0.5 |  | 0.49 |
| Introduction of solids (months)e | 5.9 ± 1.3 | 5.9 ± 1.2 | 5.8 ± 1.5 | 6.0 ± 1.4 | 5.9 ± 1.2 |  | 0.69 |
| Childcare used,g | 67 (17.8) | 6 (4.4) | 30 (31.6) | 21 (23.1) | 10 (18.5) |  | <0.01 |
|  |  |  |  |  |  |  |  |
| *Dietary characteristics (24-hour recall)* | |  |  |  |  |  |  |
| Breastmilk |  |  |  |  |  |  |  |
| Any | 215 (57.0) | 136 (100.0) | 17 (17.7) | 20 (22.0) | 42 (77.8) |  | <0.01 |
| Predominant (≥80%)i | 136 (36.1) | 136 (100.0) | 0 (0.0) | 0 (0.0) | 0 (0.0) |  | <0.01 |
| Formula |  |  |  |  |  |  |  |
| Any | 255 (67.6) | 31 (22.8) | 96 (100.0) | 91 (100.0) | 37 (68.5) |  | <0.01 |
| Predominant (≥80%)i | 154 (40.9) | 0 (0.0) | 80 (83.3) | 73 (80.2) | 1 (1.9) |  | <0.01 |
| Cow’s milk (>0 servings) | 33 (8.8) | 1 (0.7) | 4 (4.2) | 2 (2.2) | 26 (48.2) |  | <0.01 |
| Other dairy (≥1 serving) | 99 (26.3) | 43 (31.6) | 31 (32.3) | 8 (8.8) | 17 (31.5) |  | <0.01 |
| Infant cereal (≥1 serving) | 167 (44.3) | 48 (35.3) | 44 (45.8) | 57 (62.6) | 18 (33.3) |  | <0.01 |
| Grains (≥1 serving) | 259 (68.7) | 95 (69.9) | 77 (80.2) | 39 (42.9) | 48 (88.9) |  | <0.01 |
| Vegetables |  |  |  |  |  |  |  |
| ≥1 serving | 292 (77.5) | 104 (76.5) | 83 (86.5) | 65 (71.4) | 40 (74.1) |  | 0.08 |
| ≥2 servings | 166 (44.0) | 61 (44.9) | 68 (70.8) | 28 (30.8) | 9 (16.7) |  | <0.01 |
| Whole fruits |  |  |  |  |  |  |  |
| ≥1 serving | 312 (82.8) | 113 (83.1) | 85 (88.5) | 72 (79.1) | 42 (77.8) |  | 0.26 |
| ≥2 servings | 194 (51.5) | 85 (62.5) | 62 (64.6) | 25 (27.5) | 22 (40.7) |  | <0.01 |
| Juice (>0 servings) | 151 (40.1) | 41 (30.2) | 62 (64.6) | 24 (26.4) | 24 (44.4) |  | <0.01 |
| Animal protein (≥1 serving) | 232 (61.5) | 89 (65.4) | 86 (89.6) | 14 (15.4) | 43 (79.6) |  | <0.01 |
| Legumes (≥1 serving) | 71 (18.8) | 30 (22.1) | 18 (18.8) | 8 (8.8) | 15 (27.8) |  | <0.01 |
| Empty calorie foods (>0 servings) | 59 (15.7) | 21 (15.4) | 11 (11.5) | 10 (11.0) | 17 (31.5) |  | <0.01 |
