# Supplementary material for: Infant dietary patterns and early childhood weight outcomes: a secondary analysis from the Starting Early Program Trial
Source: Research Square preprint supplement (doi:10.21203/rs.3.rs-8077856/v1), 2025-11-25
Supplement: Supplementary file 2 [file cbb84c2e28643667ab2386d2.docx]

|  | **Breastfed-**  **High variety** | **Formula fed-**  **High variety** | | **Formula fed-**  **Low variety** | | **Mixed fed-**  **Low variety** | | | | |
| --- | --- | --- | --- | --- | --- | --- | --- | --- | --- | --- |
|  | B (95% CI) | B (95% CI) | *p* | B (95% CI) | *p* | B (95% CI) | | *p* | | |
| *WFAz* |  |  |  |  |  |  |  | |  |
| 12 months | Ref | 0.21 (-0.07, 0.50) | 0.14 | 0.28 (-0.02, 0.58) | 0.06 | -0.18 (-0.51, 0.15) | | 0.29 | | |
| 24 months | Ref | **0.38 (0.06, 0.70)** | **0.02** | **0.58 (0.24, 0.91)** | **<0.01** | 0.00 (-0.36, 0.36) | | 0.99 | | |
| 36 months | Ref | 0.31 (-0.08, 0.70) | 0.12 | **0.82 (0.42, 1.22)** | **<0.01** | -0.24 (-0.65, 0.18) | | 0.26 | | |
|  |  |  |  |  |  |  |  | |  |
|  | OR (95% CI) | OR (95% CI) | *p* | OR (95% CI) | *p* | OR (95% CI) | | *p* | | |
| *WFA ≥85th percentile* |  |  |  |  |  |  |  | |  |
| 24 months | Ref | 1.51 (0.69, 3.29) | 0.30 | **2.81 (1.24, 6.34)** | **0.01** | 0.83 (0.32, 2.13) | | 0.69 | | |
| 36 months | Ref | 1.51 (0.61, 3.72) | 0.37 | **2.71 (1.08, 6.77)** | **0.03** | 0.79 (0.28, 2.20) | | 0.65 | | |
