# Supplementary material for: Infant dietary patterns and early childhood weight outcomes: a secondary analysis from the Starting Early Program Trial
Source: Research Square preprint supplement (doi:10.21203/rs.3.rs-8077856/v1), 2025-11-25
Supplement: Supplementary file 3 [file f076efd98dc8f70584a780d9.docx]

**Supplemental Table 2**. Weight outcomes by 10-month infant dietary pattern class membership in the Starting Early Program Trial

| Variable | **Overall** | **Breastfed-**  **High variety** | **Formula fed-High variety** | **Formula fed-**  **Low variety** | **Mixed fed-Low variety** |  | *p*a |
| --- | --- | --- | --- | --- | --- | --- | --- |
| *WFAz*  12 monthsb | 0.44 ± 1.05 | 0.39 ± 1.12 | 0.61 ± 1.00 | 0.52 ± 1.01 | 0.18 ± 0.96 |  | 0.11 |
| 24 monthsc | 0.64 ± 1.09 | 0.44 ± 1.01 | 0.84 ± 1.15 | 0.88 ± 1.12 | 0.45 ± 1.03 |  | 0.01 |
| 36 monthsd | 0.54 ± 1.14 | 0.40 ± 1.05 | 0.69 ± 1.08 | 0.95 ± 1.25 | 0.17 ± 1.15 |  | <0.01 |
| *WFA ≥85th percentile* |  |  |  |  |  |  |  |
| 24 monthsc | 89 (31.5) | 29 (26.6) | 23 (34.3) | 27 (42.2) | 10 (23.3) |  | 0.11 |
| 36 monthsd | 69 (30.3) | 23 (24.7) | 19 (36.5) | 18 (39.1) | 9 (24.3) |  | 0.14 |

WFA: weight-for-age

aUsing one-way ANOVA or chi-squared tests

bN=331 (Breastfed-High variety=125; Formula-fed-High variety=81; Formula-fed-Low variety=77; Mixed-fed=48)

cN=283 (Breastfed-High variety=109; Formula-fed-High variety=67; Formula-fed-Low variety=64; Mixed-fed=43)

dN=228 (Breastfed-High variety=93; Formula-fed-High variety=52; Formula-fed-Low variety=46; Mixed-fed=37)
