# Supplementary material for: Infant dietary patterns and early childhood weight outcomes: a secondary analysis from the Starting Early Program Trial
Source: Research Square preprint supplement (doi:10.21203/rs.3.rs-8077856/v1), 2025-11-25
Supplement: Supplementary file 4 [file f7dc9dc161868cd9a284b01e.docx]

**Supplemental Table 1.** Fit indices for 1-5 class solutions

|  | **Log Likelihood** | **AIC** | **BIC** | **ABIC** | **Entropy** | **Smallest Class Prevalence** | **BLRT**  **(*p*)** |
| --- | --- | --- | --- | --- | --- | --- | --- |
| 2-Class | -2569.09 | 5188.18 | 5286.48 | 5207.16 | 1.00 | 36.1% | <.001 |
| 3-Class | -2538.01 | 5152.02 | 5301.44 | 5180.88 | 0.91 | 8.5% | <.001 |
| 4-Class | -2517.26 | 5136.51 | 5337.06 | 5175.24 | 0.78 | 14.3% | <.001 |
| 5-Class | -2501.56 | 5131.11 | 5382.78 | 5179.72 | 0.82 | 4.8% | .030 |

AIC: Akaike information criterion; BIC: Bayesian information criterion; ABIC: adjusted BIC; BLRT: bootstrap likelihood ration test. Lower values of AIC, BIC and ABIC indicate better fit. BLRT values indicate if the current model fits significantly better than the model with one less class.
